# Supplementary material
Source: PubMed Central journal article supplement (PMC7001861)
Supplement: NIHMS1540003-supplement-1.pdf [file NIHMS1540003-supplement-1.pdf]

**Molecular Cell, Volume 76**

**Supplemental Information**

**Distinct Binding Preferences between Ras  
and Raf Family Members and the Impact  
on Oncogenic Ras Signaling**

**Elizabeth M. Terrell, David E. Durrant, Daniel A. Ritt, Nancy E. Sealover, Erin Sheffels, Russell Spencer-Smith, Dominic Esposito, Yong Zhou, John F. Hancock, Robert L. Kortum, and Deborah K. Morrison**

## SUPPLEMENTAL FIGURES

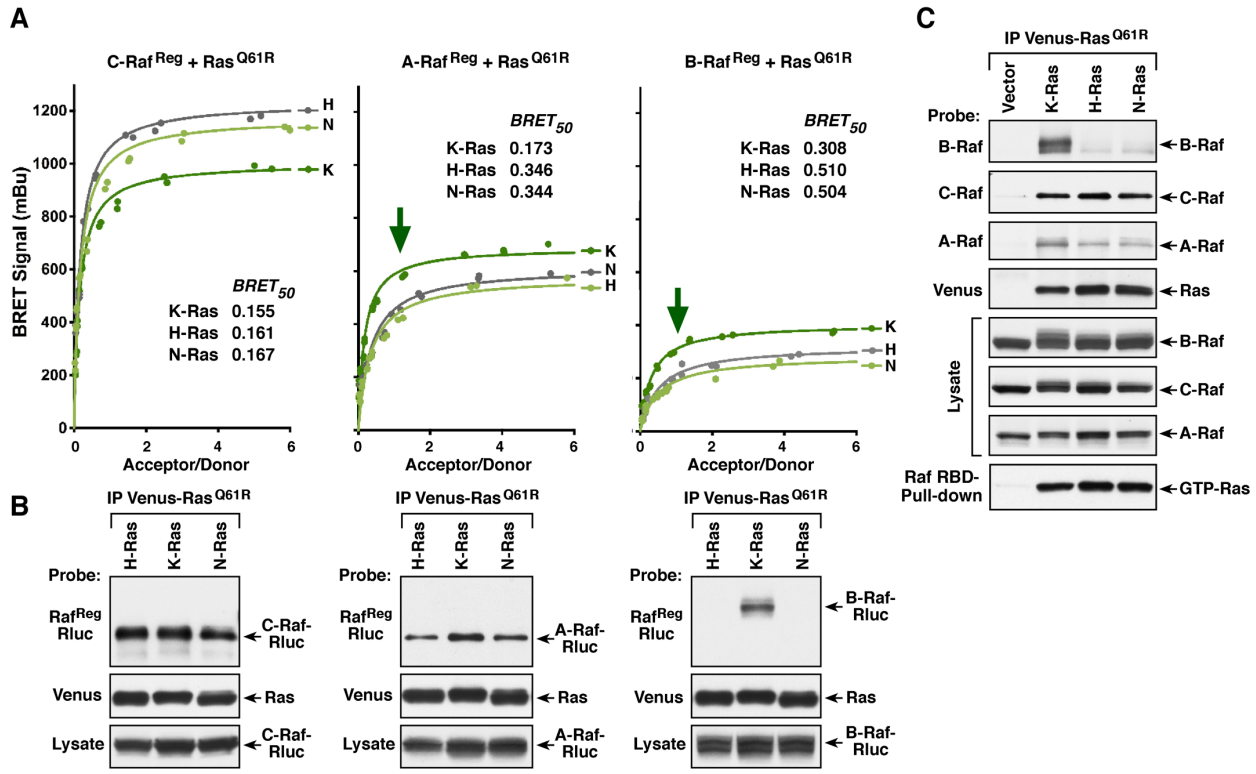

**Figure S1, related to Figure 2. BRET Analysis of Binding Interactions Between the Raf Family Members and Mutant Ras Proteins**

(A) BRET saturation curves were performed in 293FT cells to examine the interaction of C-Raf (left), A-Raf (middle), or B-Raf (right) regulatory domain proteins (Reg) with Q61R mutants of H-Ras, K-Ras, and N-Ras. The Rafs functioned as the energy donor tagged at the C-terminus with the Rluc8 enzyme and the Ras proteins served as the energy acceptor tagged at the N-terminus with the Venus fluorophore. BRET<sub>50</sub> values are also listed. (B) The BRET-tagged Ras and Raf proteins analyzed in (A) were examined in co-immunoprecipitation assays. (C) Venus-Ras<sup>Q61R</sup> complexes were immunoprecipitated from 293FT cell lysates and probed for the presence of endogenous B-Raf, C-Raf, or A-Raf and Venus-Ras by immunoblot analysis. Venus-Ras<sup>Q61R</sup> proteins were also examined for GTP-loading in Raf RBD pull-down assays, and lysates were examined for B-Raf, C-Raf, and A-Raf levels. These findings demonstrate the distinct binding preferences of the Raf and Ras family members.

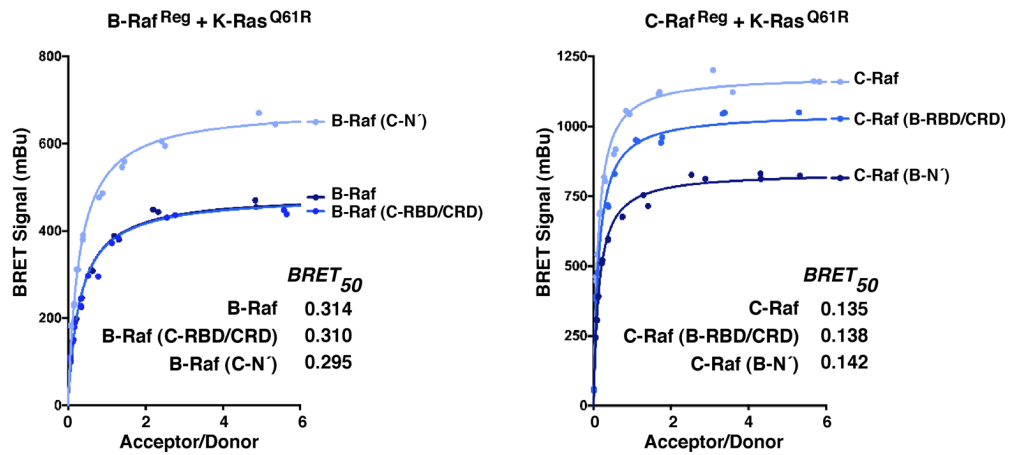

**Figure S2, related to Figure 3. Effect of Raf N'-Segment on the Raf/K-Ras<sup>Q61R</sup> Interaction**

Raf proteins were generated in which regions of the B-Raf and C-Raf regulatory domains were exchanged. Shown are BRET saturation curves examining the interaction of WT- or domain-

exchanged Raf<sup>Reg</sup>-Rluc proteins with Venus-K-Ras<sup>Q61R</sup>. *BRET*<sub>50</sub> values are also listed. The

presence of the B-Raf N'-segment reduced the *BRET*<sub>max</sub> of the Raf/K-Ras<sup>Q61R</sup> interaction but had no significant effect on the *BRET*<sub>50</sub> values.

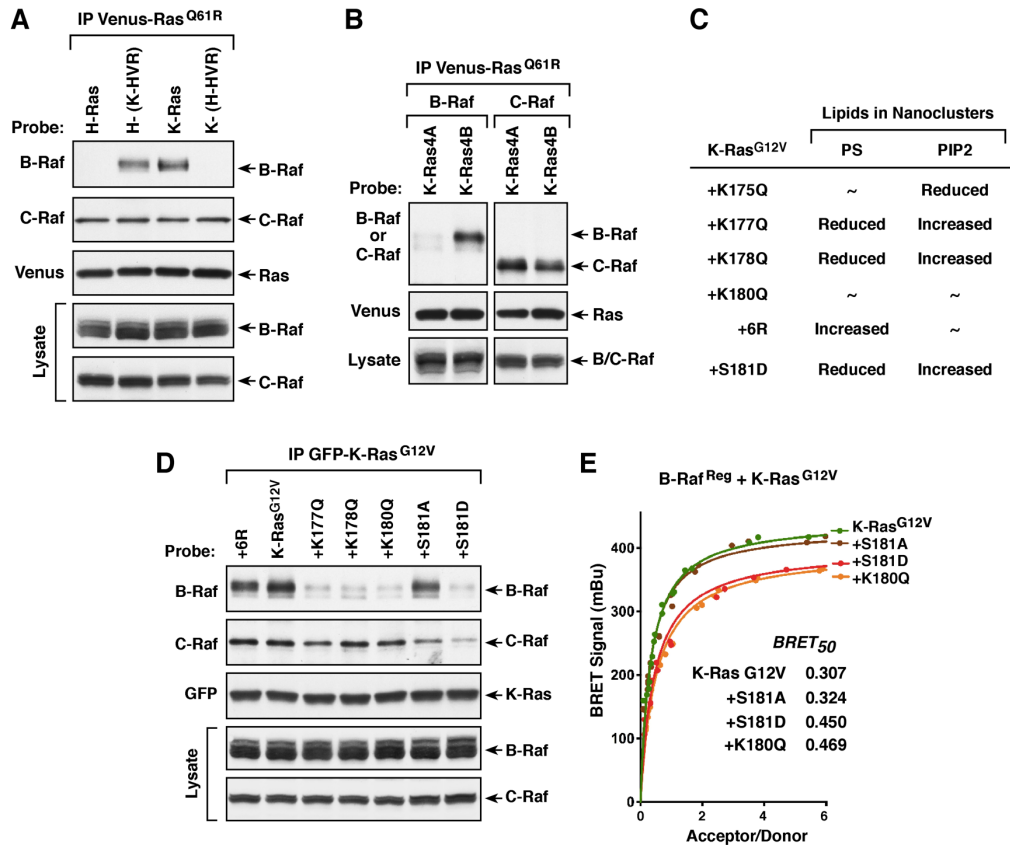

**Figure S3, related to Figure 4. Analysis of B-Raf/Ras Binding Requirements**

(A) WT or HVR-exchanged Venus-Ras<sup>Q61R</sup> proteins were immunoprecipitated from 293FT cell lysates and examined for the presence of endogenous B-Raf or C-Raf and Venus-Ras. Endogenous B-Raf selectively interacts with mutant Ras proteins that contain the K-Ras HVR, whereas endogenous C-Raf interacts with all Ras proteins regardless of the HVR origin. (B) Venus-tagged K-Ras4A<sup>Q61R</sup> or K-Ras4B<sup>Q61R</sup> proteins were immunoprecipitated from 293FT cell lysates and examined for the presence of endogenous B-Raf or C-Raf and Venus-Ras. Endogenous C-Raf, but not B-Raf, efficiently co-immunoprecipitates with the K-Ras4A splice variant, which lacks the PBR sequences. (C) Listed are the reported effects of the PBR mutations on the lipid composition of K-Ras<sup>G12V</sup> membrane nanoclusters. (D) GFP-tagged K-Ras<sup>G12V</sup> complexes were immunoprecipitated from cell lysates and examined for the presence of endogenous B-Raf or C-Raf and GFP-K-Ras<sup>G12V</sup>. Binding of endogenous B-Raf was lower to the PBR mutants that have a reduced positive charge. (E) BRET saturation curves are shown examining the interaction of Raf<sup>Reg</sup>-Rluc with the indicated Venus-Ras<sup>G12V</sup> proteins. BRET<sub>50</sub> values are also listed.

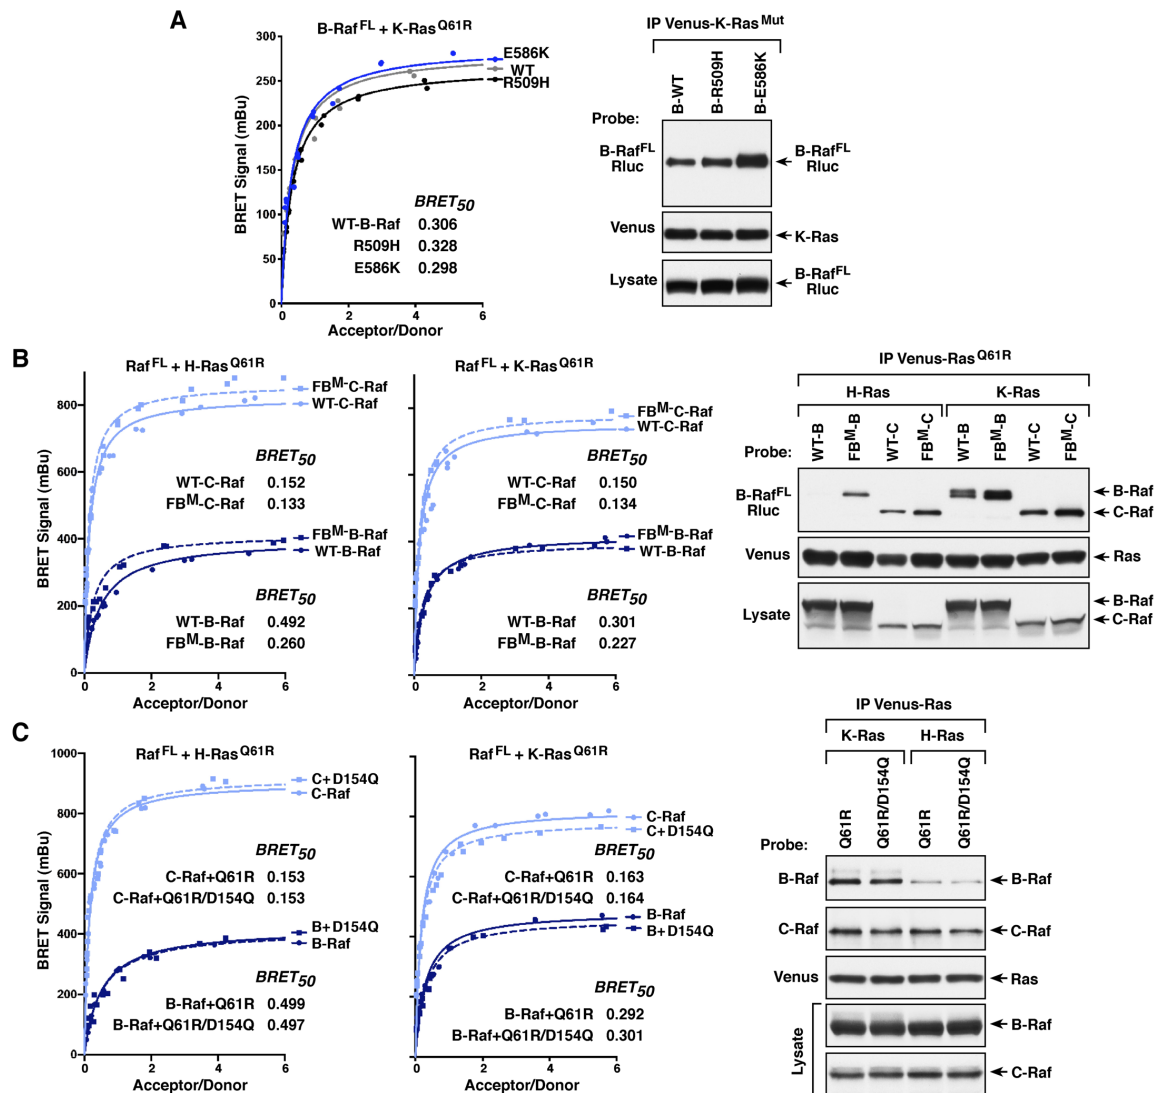

**Figure S4, related to Figure 5. Effect of B-Raf/C-Raf Dimerization on Ras/Raf Binding**

(A) BRET (left) and co-immunoprecipitation assays (right) were performed in 293FT cells examining the interaction of WT, R509H (dimer-defective), or E586K (dimer-enhanced) B-Raf<sup>FL</sup>-Rluc proteins with Venus-K-Ras<sup>Q61R</sup>. (B) BRET (left) and coimmunoprecipitation assays (right) were performed examining the ability of WT Raf<sup>FL</sup>-Rluc or Raf proteins containing mutations in the ERK-induced feedback phosphorylation sites (FB<sup>M</sup>-B-Raf<sup>FL</sup>-Rluc or FB<sup>M</sup>-C-Raf<sup>FL</sup>-Rluc) to interact with Venus-tagged H-Ras<sup>Q61R</sup> or K-Ras<sup>Q61R</sup>. (C) BRET (left) and co-immunoprecipitation assays (right) were performed examining the interaction of B-Raf<sup>FL</sup>-Rluc or C-Raf<sup>FL</sup>-Rluc with Venus-tagged H-Ras<sup>Q61R</sup>, K-Ras<sup>Q61R</sup>, H-Ras<sup>Q61R/D154Q</sup> or K-Ras<sup>Q61R/D154Q</sup>. Events that alter B-Raf/C-Raf dimer formation, but not Ras dimerization, impact the Ras/Raf interaction.

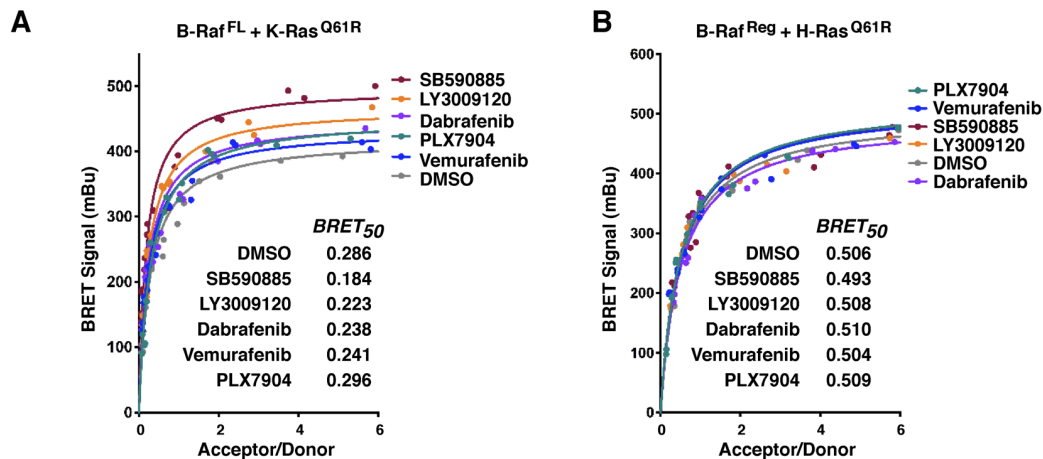

**Figure S5, related to Figure 5. Effect of Raf Inhibitor Treatment on Ras/Raf Binding Interactions in Live Cells**

(A) 293FT cells expressing full-length B-Raf<sup>FL</sup>-Rluc and Venus-K-Ras<sup>Q61R</sup> were treated for 1 hr with DMSO or the indicated ATP-competitive Raf inhibitors at 1  $\mu$ M concentration before BRET measurements were obtained. BRET saturation curves and BRET<sub>50</sub> values are shown depicting the effect of Raf inhibitor treatment on the B-Raf/K-Ras interaction. (B) 293FT cells expressing the B-Raf regulatory domain B-Raf<sup>Reg</sup>-Rluc protein and Venus-H-Ras<sup>Q61R</sup> were treated as in (A) prior to obtaining the BRET measurements. The BRET results indicate that the effect of the Raf inhibitors on the B-Raf/H-Ras<sup>Q61R</sup> interaction requires binding of the compounds to the B-Raf catalytic domain.

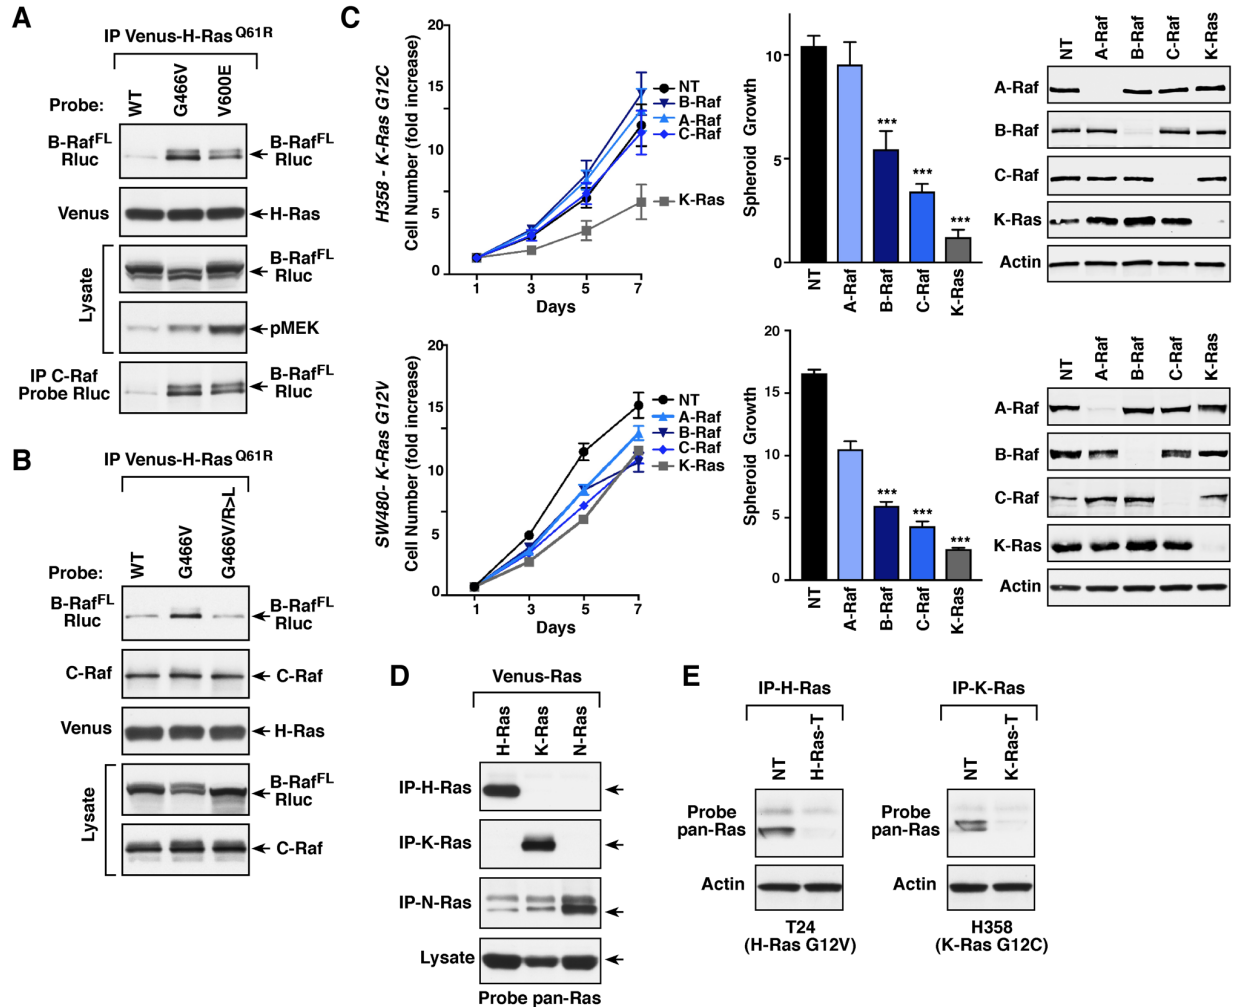

**Figure S6, related to Figure 6. Elucidating C-Raf Functions in Ras-dependent Signaling**

(A) Co-immunoprecipitation assays were performed comparing the ability of WT, G466V, or V600E-B-Raf<sup>FL</sup>-Rluc proteins to interact with Venus-H-Ras<sup>Q61R</sup>. Endogenous C-Raf was also immunoprecipitated and examined for dimerization with the B-Raf<sup>FL</sup>-Rluc mutants. Lysates were monitored for pMEK and B-Raf-Rluc levels. (B) Co-immunoprecipitation assays were performed examining the interaction of WT, G466V or G466V/R>L B-Raf<sup>FL</sup>-Rluc with Venus-H-Ras<sup>Q61R</sup>. Co-immunoprecipitation of endogenous C-Raf with Venus-H-Ras<sup>Q61R</sup> is also shown. (C) Human cancer cell lines harboring K-Ras mutations, H358 and SW480, were infected with lentiviruses expressing Cas9 and either a non-targeting sgRNA (NT) or sgRNAs targeting the *A-Raf*, *B-Raf*, *C-Raf*, or *K-Ras* gene. Cell lysates were examined for A-Raf, B-Raf, C-Raf, and K-Ras expression (right). Cells were assessed for 2D cell proliferation (left) and for 3D spheroid growth (middle). Data are

represented as mean +/-SD. \*\*\*p < 0.001. (D) Lysates of 293FT cells expressing Venus-tagged H-Ras<sup>G12V</sup>, K-Ras<sup>G12V</sup>, or N-Ras<sup>G12V</sup> were each incubated with H-Ras, K-Ras, or N-Ras antibodies, following which the immune complexes were probed with pan-Ras antibodies in immunoblot analysis. These results indicate that the Ras antibodies are functional in immunoprecipitation assays and that the H-Ras and K-Ras antibodies specifically immunoprecipitate H-Ras and K-Ras respectively, whereas the N-Ras antibody exhibits some cross-reactivity with H-Ras and K-Ras. (E) Endogenous H-Ras was immunoprecipitated from lysates of control (NT) or H-Ras-depleted (H-Ras-T) T24 cells using the H-Ras antibody, and endogenous K-Ras was immunoprecipitated from lysates of control (NT) or K-Ras-depleted (K-Ras-T) H358 cells using the K-Ras antibody. The immune complexes were then probed with pan-Ras antibodies to further demonstrate the specificity of the H-Ras and K-Ras antibodies.
